# Supplementary material for: Graphene oxide–polyaniline nanocomposite as a potential sorbent for dispersive solid-phase extraction and determination of selected pharmaceutical and personal care products in wastewater samples using HPLC with a diode-array detector
Source: Royal Society of Chemistry journal article supplement (doi:10.1039/c5ay03182f), 2016-01-01
Supplement: c5ay03182f1.pdf [file c5ay03182f1.pdf]

**Fig. S1:** FT-IR spectra of GO and GO/PANI.

**Fig. S2:** TGA curves of GO and GO/PANI composites.
