# Supplementary material for: Graphene oxide–polyaniline nanocomposite as a potential sorbent for dispersive solid-phase extraction and determination of selected pharmaceutical and personal care products in wastewater samples using HPLC with a diode-array detector
Source: Royal Society of Chemistry journal article supplement (doi:10.1039/c5ay03182f), 2016-01-01
Supplement: c5ay03182f4.pdf [file c5ay03182f4.pdf]

**Table S1**

The chromatographic data regions for modeling by MCR-ALS

| Analyte | Retention time | Time region        | Wavelength range | Factors * |
|---------|----------------|--------------------|------------------|-----------|
|         | Scan No.(min)  | Scan No. (min)     | Scan No. (min)   |           |
| CBZ     | 618 (4.1)      | 4.08-4.17(610-627) | 236-400(24-106)  | 3/3       |
| DIC     | 784 (5.2)      | 5.14-5.29(773-796) | 242-400(27-106)  | 3/2       |

\*Number of MCR-ALS factors in influent and effluent

**Table S2**

The BBD design and its response values

| Std | Run | Block   | Factor 1<br>A:sorbent | Factor 2<br>B:desorb vol | Factor 3<br>C:desorb ratio | Response 1<br>R1 | Response 2<br>R2 | Response 3<br>R3 | Response 4<br>R4 | Response 5<br>R5 | Response 6<br>R6 | Response 7<br>R7 |
|-----|-----|---------|-----------------------|--------------------------|----------------------------|------------------|------------------|------------------|------------------|------------------|------------------|------------------|
| 3   | 1   | Block 1 | 25.00                 | 3.00                     | 0.00                       | 61.36            | 228              | 61.8             | 831              | 204              | 34.3             | 0.677133         |
| 12  | 2   | Block 1 | 40.00                 | 3.00                     | 1.00                       | 98.1             | 311.6            | 89.2             | 1051.4           | 264.7            | 59.7             | 0.976802         |
| 13  | 3   | Block 1 | 40.00                 | 2.00                     | 0.00                       | 82.5             | 265.2            | 75.2             | 856.9            | 248.5            | 56.4             | 0.850646         |
| 6   | 4   | Block 1 | 55.00                 | 2.00                     | -1.00                      | 66.5             | 245              | 68.3             | 816.7            | 188.5            | 44               | 0.724421         |
| 7   | 5   | Block 1 | 25.00                 | 2.00                     | 1.00                       | 62.7             | 218.1            | 55.9             | 671.7            | 193.7            | 29.4             | 0.618657         |
| 11  | 6   | Block 1 | 40.00                 | 1.00                     | 1.00                       | 71.6             | 238.7            | 67.3             | 959.3            | 238.8            | 44.6             | 0.780074         |
| 17  | 7   | Block 1 | 40.00                 | 2.00                     | 0.00                       | 91.7             | 272.6            | 69.8             | 977.6            | 243              | 57.1             | 0.876619         |
| 10  | 8   | Block 1 | 40.00                 | 3.00                     | -1.00                      | 81.8             | 294.7            | 84.8             | 998.1            | 259.8            | 50.4             | 0.894501         |
| 8   | 9   | Block 1 | 55.00                 | 2.00                     | 1.00                       | 71.7             | 256.4            | 71.4             | 907.6            | 197.7            | 51.5             | 0.784198         |
| 15  | 10  | Block 1 | 40.00                 | 2.00                     | 0.00                       | 89.4             | 276.4            | 72.8             | 1017.8           | 239.6            | 53.6             | 0.875667         |
| 1   | 11  | Block 1 | 25.00                 | 1.00                     | 0.00                       | 59.1             | 204.3            | 52.3             | 714.5            | 187.9            | 18.7             | 0.55865          |
| 4   | 12  | Block 1 | 55.00                 | 3.00                     | 0.00                       | 78.6             | 269.1            | 78.2             | 1210.4           | 226.8            | 52.1             | 0.876551         |
| 2   | 13  | Block 1 | 55.00                 | 1.00                     | 0.00                       | 62.2             | 231.7            | 64.4             | 789.9            | 171.9            | 42.5             | 0.684319         |
| 16  | 14  | Block 1 | 40.00                 | 2.00                     | 0.00                       | 86.7             | 267.8            | 75.8             | 1003.3           | 245              | 56.8             | 0.882116         |
| 5   | 15  | Block 1 | 25.00                 | 2.00                     | -1.00                      | 56.4             | 210.2            | 53.8             | 765.5            | 186.3            | 27.6             | 0.603132         |
| 9   | 16  | Block 1 | 40.00                 | 1.00                     | -1.00                      | 70.9             | 228.7            | 65.1             | 824.2            | 228.5            | 40.8             | 0.733326         |
| 14  | 17  | Block 1 | 40.00                 | 2.00                     | 0.00                       | 88.4             | 269.7            | 74.2             | 986.5            | 248.3            | 58.5             | 0.886706         |
