# Supplementary figures and images for: Graphene oxide–polyaniline nanocomposite as a potential sorbent for dispersive solid-phase extraction and determination of selected pharmaceutical and personal care products in wastewater samples using HPLC with a diode-array detector
Source: Royal Society of Chemistry journal article supplement (doi:10.1039/c5ay03182f), 2016-01-01

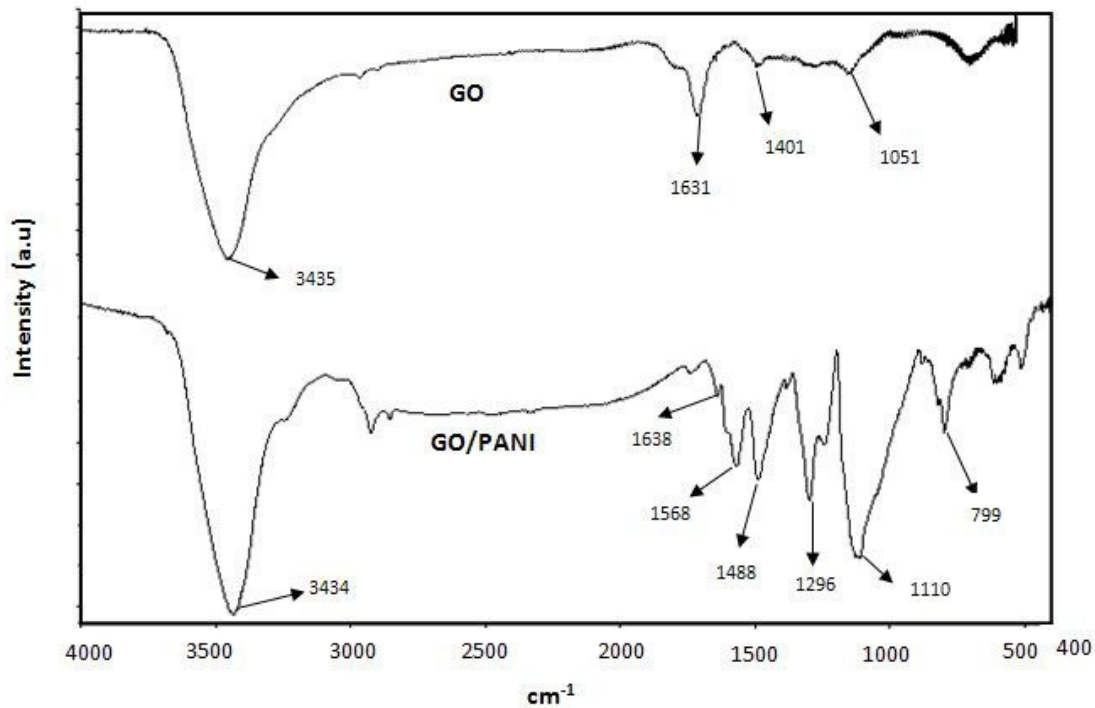

Supplement: c5ay03182f2.pdf [file c5ay03182f2.pdf]

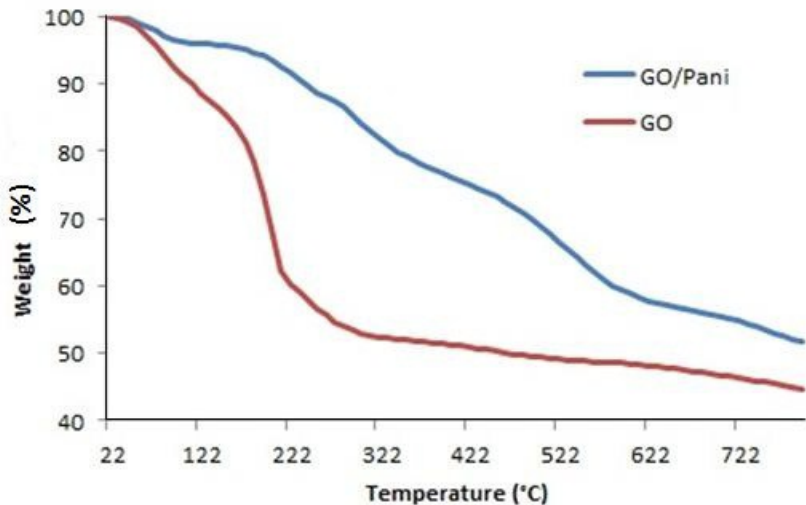

Supplement: c5ay03182f3.pdf [file c5ay03182f3.pdf]
